# Supplementary material for: Translation, Cross-Cultural Adaptation, and Validation of the Galician Version of the Nurse Prescribing Self-Efficacy Scale
Source: MDPI journal article supplement (doi:10.3390/healthcare10122563), 2022-12-17
Supplement: s1 [file s1]

**Table S1.** Galician version of the Nurse Prescribing Self-Efficacy Scale (G-NP-SES)

**Indique o seu nivel de confianza coas afirmacións detalladas a continuación, empregando a seguinte escala:**

| 0%                                                | 10 | 20 | 30 | 40 | 50%                                           | 60 | 70 | 80 | 90 | 100%                                          |
|---------------------------------------------------|----|----|----|----|-----------------------------------------------|----|----|----|----|-----------------------------------------------|
| Totalmente<br>seguro de que<br>NON podo<br>facelo |    |    |    |    | Moderadamente<br>seguro de que podo<br>facelo |    |    |    |    | Totalmente<br>seguro de que<br>SI podo facelo |

| <b>Á hora de usar ou indicar medicamentos ou produtos sanitarios estou seguro de que SEMPRE podo...</b>                                                      | <b>% de confianza (0-100)</b> |
|--------------------------------------------------------------------------------------------------------------------------------------------------------------|-------------------------------|
| 1. Realizar unha valoración inicial axeitada do paciente que necesita prescrición, independentemente do cadro clínico que presente.                          |                               |
| 2. Identificar todas as opcións terapéuticas dispoñibles segundo o problema de saúde que presenta o paciente, independentemente da complexidade do problema. |                               |
| 3. Dar as instrucións de administración axeitadas para calquera medicamento que receite.                                                                     |                               |
| 4. Valorar as contraindicacións da medicación ou produtos prescritos, independentemente de cal sexa a situación de saúde do paciente.                        |                               |
| 5. Detectar os efectos secundarios ou reaccións adversas da medicación prescrita, independentemente de cal sexa a situación de saúde do paciente.            |                               |
| 6. Tratar unha reacción adversa non previsible ou reacción alérxica derivada da administración do medicamento ou produto sanitario prescrito.                |                               |
| 7. Consultar información actualizada baseada na evidencia sobre medicación ou produtos sanitarios, en todos os casos.                                        |                               |
| 8. Acceder a protocolos actualizados e guías de práctica clínica establecidos polas autoridades competentes en cada caso.                                    |                               |
| 9. Seguir os protocolos e guías de práctica clínica de forma individualizada, segundo as recomendacións da autoridade competente.                            |                               |
| 10. Tomar decisións de forma conxunta con profesionais do equipo con respecto ao proceso de prescrición.                                                     |                               |
| 11. Diferenciar situacións nas que podo prescribir de forma independente de aquelas nas que necesito seguir os protocolos existentes.                        |                               |
| 12. Decidir cando é apropiado iniciar un novo tratamento dos pacientes independentemente da situación.                                                       |                               |
| 13. Decidir cando é apropiado que os pacientes continúen co seu tratamento independentemente da situación.                                                   |                               |
| 14. Decidir cando é apropiado modificar o tratamento dos pacientes independentemente da situación.                                                           |                               |
| 15. Decidir cando é axeitado cesar o tratamento do paciente independentemente da situación.                                                                  |                               |
| 16. Educar aos pacientes sobre o uso terapéutico e o risco de interaccións de calquera medicación, apósito ou outro produto que prescriba.                   |                               |

- 
17. Educar aos pacientes sobre como buscar efectos secundarios de calquera medicamento, apósito ou outro produto que receite.
- 
18. Avaliar os efectos que teñen nos pacientes a educación proporcionada sobre os medicamentos/productos prescritos.
- 
19. Avaliar a adherencia dos pacientes ao tratamento despois de receitalles medicamentos, apósitos ou calquera outro produto.
-
